# Supplementary material
Source: PubMed Central journal article supplement (PMC8094179)

## Among all women

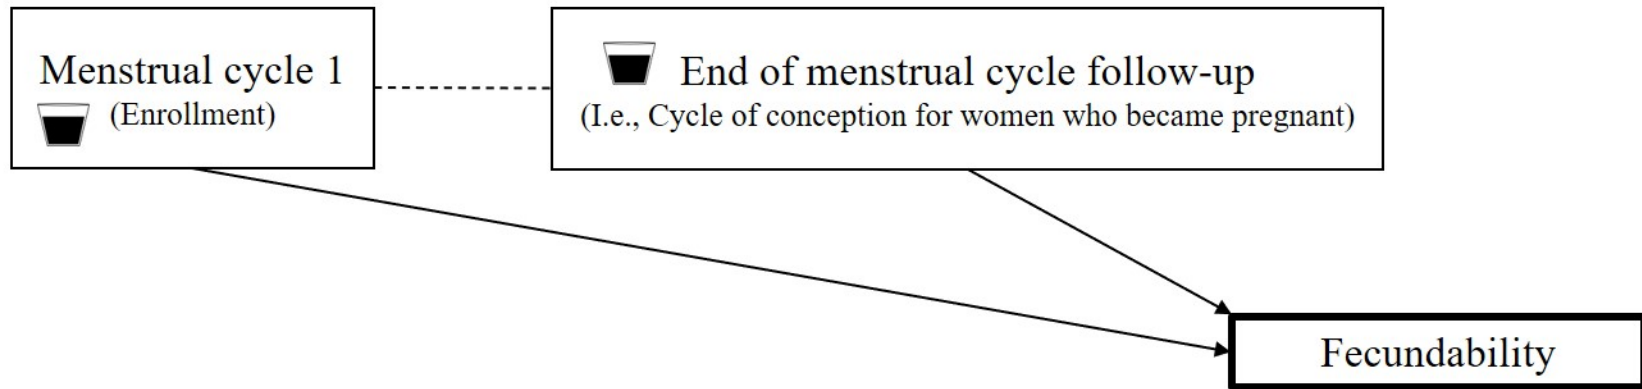

## Among women who became pregnant

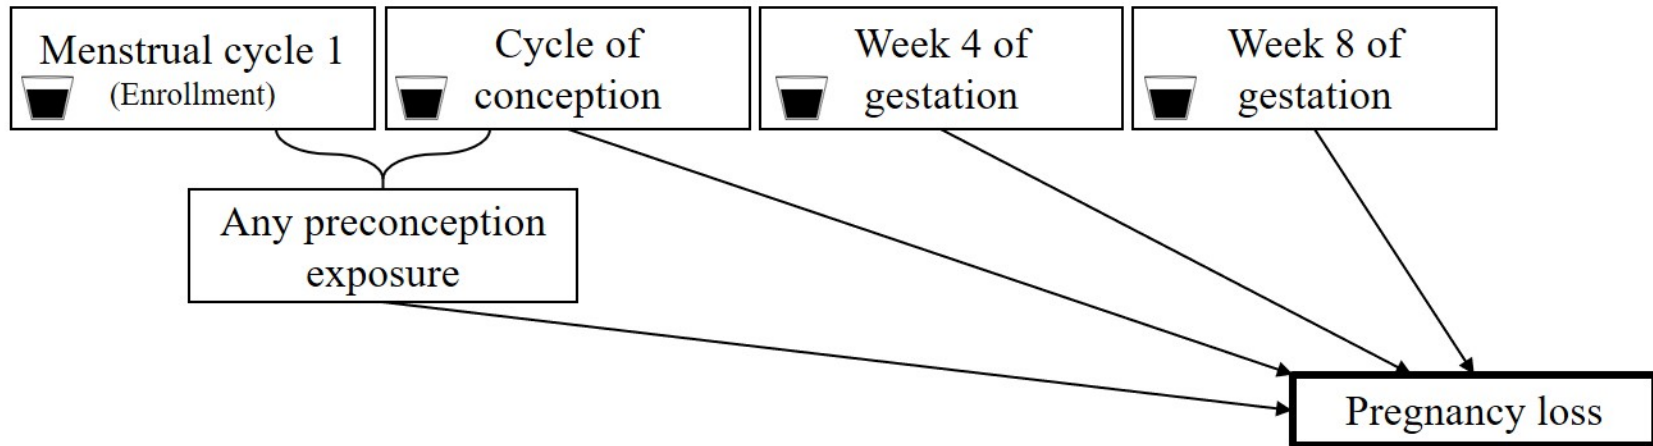

Supplement: NIHMS1639256-supplement-1.pdf [file NIHMS1639256-supplement-1.pdf]

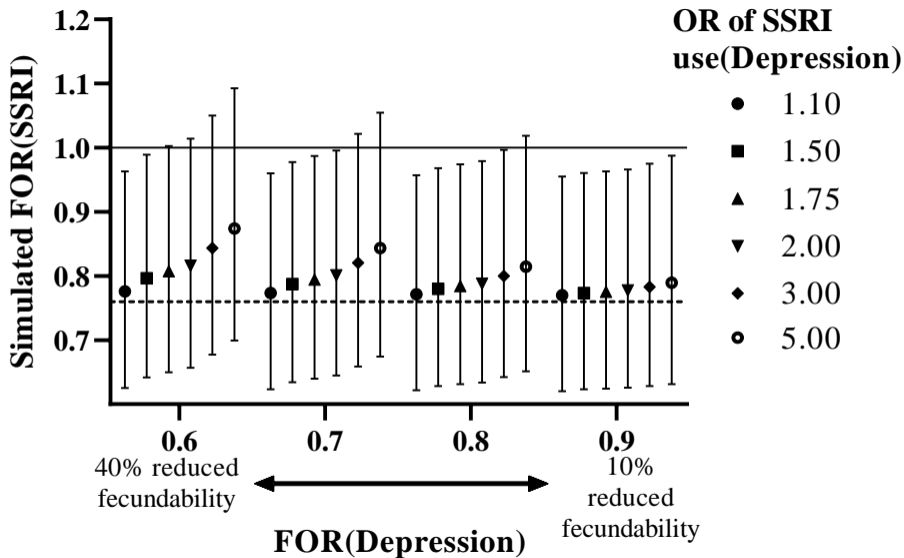

Supplement: NIHMS1639256-supplement-2.pdf [file NIHMS1639256-supplement-2.pdf]
